# Supplementary material
Source: PubMed Central journal article supplement (PMC1937544)

4.1B- or Control shRNAs in PC3-#78

pSIR    siGFP    DL1    DL2    DL3    DL4

4.1B/DAL-1

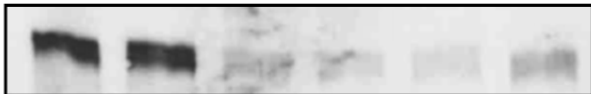

GAPDH

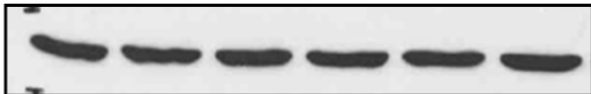

Relative qPCR  
expression  
levels *in vitro*

100%    NA    8%    9%    17%    12%

Subcutaneous  
tumors *in vivo*

siGFP    siGFP    DL1    DL2

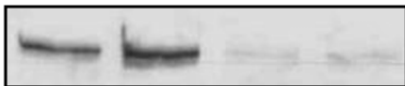

Supplement: pnas_0705499104_4.pdf [file pnas_0705499104_4.pdf]
