# Supplementary material
Source: PubMed Central journal article supplement (PMC1937544)
Supplement: pnas_0705499104_9.pdf [file pnas_0705499104_9.pdf]

## Dorsolateral Prostate

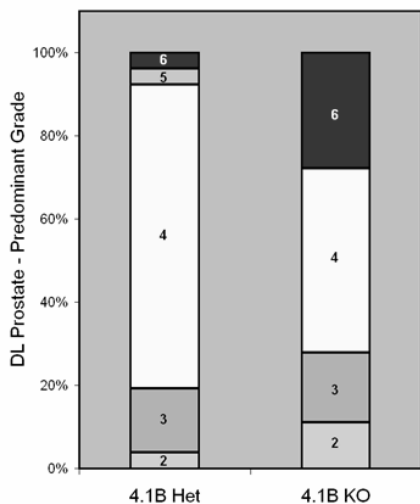

## Ventral Prostate

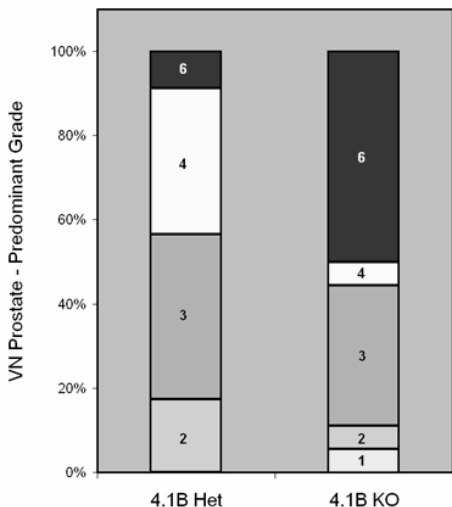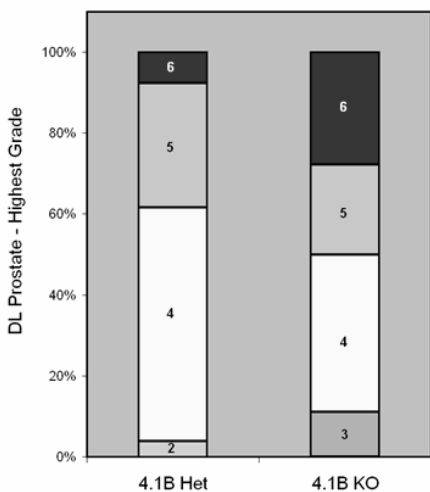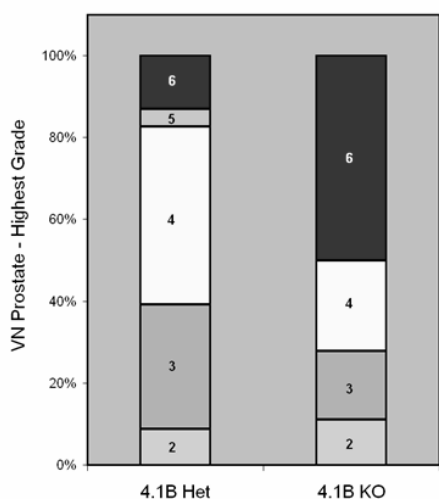

|                            | Prostate Lobes | P-Value |
|----------------------------|----------------|---------|
| Predominant Grade of 6     | Dorsal Only    | 0.02    |
| Predominant Grade of 6     | Ventral Only   | 0.003   |
| Highest Grade of 6         | Dorsal Only    | 0.07    |
| Highest Grade of 6         | Ventral Only   | 0.01    |
| Highest Overall Grade of 6 | All Lobes      | 0.003   |
