# Supplementary material
Source: PubMed Central journal article supplement (PMC1937544)

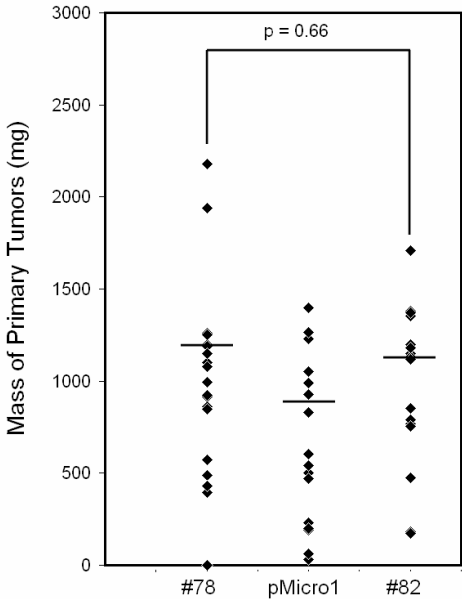

Supplement: pnas_0705499104_1.pdf [file pnas_0705499104_1.pdf]

PC3M #78 #82

4.1G

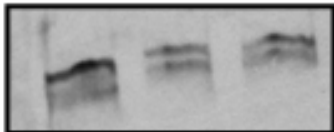

4.1N

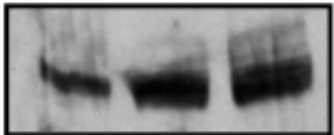

Supplement: pnas_0705499104_3.pdf [file pnas_0705499104_3.pdf]

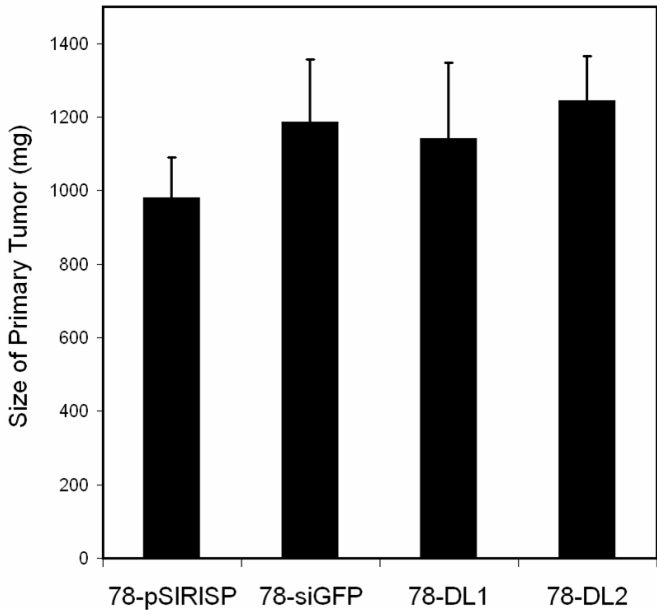

Supplement: pnas_0705499104_5.pdf [file pnas_0705499104_5.pdf]

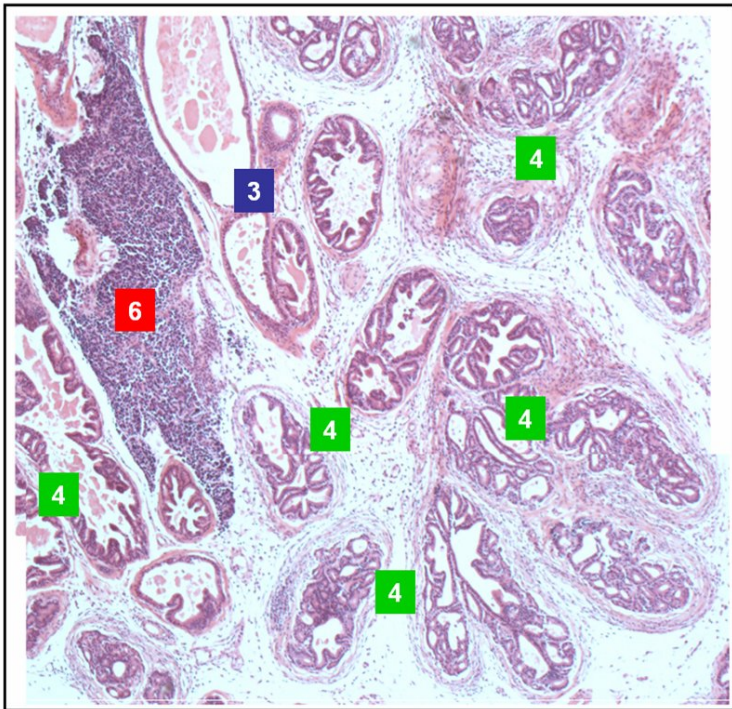

Supplement: pnas_0705499104_8.pdf [file pnas_0705499104_8.pdf]
